# Supplementary material
Source: publisher site journal article supplement (https://www.dovepress.com/article/355083)
Supplement: Supplementary file 1 [file get_supplementary_file.php]

Supplementary materials

Supplementary Table 1: Differences in mean length of stay by demographic characteristics, admission diagnoses, serum biomarkers, and treatments among patients hospitalized for COVID-19 (n=1626)

|  |  | n | Mean (SD) | p-valuea |
| --- | --- | --- | --- | --- |
| Dementia | Yes | 173 | 16.3 (24.0) | <0.001c |
|  | No | 1453 | 8.7 (10.0) | - |
| Age (years) | 18 to 39 | 126 | 5.1 (5.0) | <0.001d |
|  | 40 to 49 | 165 | 7.7 (16.6) | - |
|  | 50 to 64 | 397 | 8.3 (10.5) | - |
|  | 65 to 74 | 437 | 10.7 (13.1) | - |
|  | 74 and older | 501 | 11.1 (12.9) | - |
| Anemia | Yes | 151 | 14.3 (12.0) | <0.001 |
|  | No | 1475 | 9.0 (12.5) | - |
| TIA | Yes | 154 | 13.3 (13.7) | <0.001 |
|  | No | 1472 | 9.1 (12.3) | - |
| Marital status | Married | 794 | 8.3 (7.8) | <0.001d |
|  | Single | 315 | 12.3 (18.9) | - |
|  | Othere | 491 | 9.9 (13.5) | - |
| Thrombocytopenia | Yes | 177 | 13.0 (11.0) | <0.001 |
|  | No | 1449 | 9.1 (12.6) | - |
| CKD failure | Yes | 576 | 12.0 (11.3) | <0.001 |
|  | No | 1050 | 8.2 (12.9) | - |
| Hypertension | Yes | 1032 | 10.9 (13.1) | <0.001 |
|  | No | 594 | 7.2 (11.1) | - |
| Leucopenia | Yes | 109 | 13.0 (10.7) | <0.001 |
|  | No | 1517 | 9.3 (12.6) | - |
| Survived | Yes | 1441 | 9.1 (12.7) | <0.001 |
|  | No | 185 | 12.7 (10.7) | - |
| ARF | Yes | 673 | 11.6 (9.6) | <0.001 |
|  | No | 953 | 8.1 (14.1) | - |
| ICU | Yes | 225 | 12.3 (10.3) | <0.001 |
|  | No | 1401 | 9.1 (12.8) | - |
| Insurance type | Medicaid/Medicare | 1294 | 10.1 (13.6) | <0.001c |
|  | Otherf | 332 | 7.1 (6.6) | - |
| CHF | Yes | 295 | 12.0 (9.9) | <0.001 |
|  | No | 1331 | 9.0 (13.0) | - |
| BMI | <18.5 | 47 | 9.1 (7.9) | 0.049b |
|  | 18.5- <25.0 | 280 | 10.9 (16.3) | - |
|  | 25.0 - <30.0 | 422 | 9.1 (8.3) | - |
|  | 30.0 - <35.0 | 313 | 8.0 (7.0) | - |
|  | 35 and greater | 495 | 8.1 (7.5) | - |
| Diabetes | Yes | 628 | 11.1 (12.0) | <0.001c |
|  | No | 998 | 8.5 (12.8) | - |
| D-dimer > 0.5 | Yes | 756 | 10.1 (9.2) | <0.001c |
|  | No | 248 | 7.5 (6.3) | - |
| Pancytopenia | Yes | 48 | 11.8 (11.9) | 0.02 |
|  | No | 1578 | 9.5 (12.5) | - |
| Opiate dependence | Yes | 1128 | 10.2 (11.1) | <0.001c |
|  | No | 498 | 8.0 (15.1) | - |
| Lipidemias | Yes | 545 | 10.9 (11.6) | <0.001 |
|  | No | 1081 | 8.8 (12.9) | - |
| COPD | Yes | 413 | 10.7 (9.8) | <0.001 |
|  | No | 1213 | 9.1 (13.3) | - |
| Gender | Male | 807 | 10.0 (12.7) | 0.01 |
|  | Female | 819 | 9.0 (12.3) | - |
| Dexamethasone | Yes | 1258 | 9.4 (9.1) | <0.001c |
|  | No | 368 | 10.1 (20.2) | - |
| LDH ≥ 280 U/L | Yes | 397 | 11.5 (11.2) | <0.001 |
|  | No | 461 | 9.3 (9.1) | - |
| CRP ≥ 3.0 mg/L | Yes | 686 | 10.4 (8.8) | 0.003c |
|  | No | 277 | 9.8 (12.2) | - |
| High ferritin | Yes | 520 | 10.5 (8.7) | 0.03 |
|  | No | 449 | 10.1 (11.7) | - |
| Remdesivir | Yes | 688 | 9.6 (8.0) | <0.001c |
|  | No | 938 | 9.5 (15.0) | - |
| Pulmonary embolism | Yes | 31 | 11.6 (9.4) | 0.06 |
|  | No | 1595 | 9.5 (12.6) | - |
| Stroke | Yes | 39 | 11.4 (8.1) | 0.06 |
|  | No | 1587 | 9.5 (12.6) | - |
| Liver cirrhosis | Yes | 24 | 12.3 (12.8) | 0.09 |
|  | No | 1602 | 9.5 (12.5) | - |
| Cancer | Yes | 68 | 10.0 (10.1) | 0.13 |
|  | No | 1558 | 9.5 (12.6) | - |
| High erythrocyte sedimentation rate | Yes | 238 | 11.9 (10.3) | 0.5 |
|  | No | 81 | 12.1 (14.8) | - |
| Tobacco dependence | Yes | 133 | 10.9 (18.3) | 0.63 |
|  | No | 1493 | 9.4 (11.9) | - |
| Alcohol dependence | Yes | 19 | 9.2 (9.2) | 0.88 |
|  | No | 1607 | 9.5 (12.5) | - |
| Hepatitis | Yes | 11 | 12.3 (7.1) | 0.94 |
|  | No | 215 | 14.0 (13.3) | - |

BMI: body mass index; CKD: chronic kidney disease; ARF: acute respiratory failure; COPD: chronic obstructive pulmonary disease; TIA: transient ischemic attack; CRP: C-reactive protein; LDH: lactate dehydrogenase.

Sorted by statistical significance and effect size, with statistically significant results with the highest effect size at the top of the table.

aComparisons tested using Student t-tests unless otherwise noted. Bolded p-values are <0.05.

bLinear regression with robust variances to adjust for unequal variances.

cAdjusted for unequal variances.

dComparison tested with ANOVA due to >2 groups.

eCombined for statistical purposes: divorced, separated, widow, widower.

fCombined for statistical purposes: agency, employee health insurance, commercial, self-pay, workers compensation.

Supplementary Table 2: Differences in demographic characteristics, intake diagnoses, serum biomarkers, and treatments among patients that were readmitted within 30 days of hospitalization versus those that were not readmitted in a sample of patients that survived first hospitalization for COVID-19 (n=1441)

|  |  | Readmitted (n=292) | | Not readmitted (n=1149) | | Total (n=1441) | |  |
| --- | --- | --- | --- | --- | --- | --- | --- | --- |
|  |  | n | % (within row) | n | % (within row) | n | % (of total) | p-valuea |
| BMI | <18.5 | 13 | 33.3 | 26 | 66.7 | 39 | 2.8 | 0.01b |
|  | 18.5- <25.0 | 58 | 24.6 | 178 | 75.4 | 236 | 17 | - |
|  | 25.0 - <30.0 | 85 | 22.9 | 286 | 77.1 | 371 | 26.8 | - |
|  | 30.0 - <35.0 | 53 | 18.3 | 237 | 81.7 | 290 | 20.9 | - |
|  | 35 and greater | 71 | 15.8 | 378 | 84.2 | 449 | 32.4 | - |
| Stroke | Yes | 11 | 35.5 | 20 | 64.5 | 31 | 2.2 | 0.03 |
|  | No | 281 | 19.9 | 1129 | 80.1 | 1410 | 97.9 | - |
| Age (years) | 18 to 39 | 13 | 10.4 | 112 | 89.6 | 125 | 8.7 | 0.001b |
|  | 40 to 49 | 21 | 13 | 140 | 87 | 161 | 11.2 | - |
|  | 50 to 64 | 71 | 19 | 302 | 81 | 373 | 25.9 | - |
|  | 65 to 74 | 88 | 23 | 294 | 77 | 382 | 26.5 | - |
|  | 74 and older | 99 | 24.8 | 301 | 75.3 | 400 | 27.8 | - |
| Pancytopenia | Yes | 14 | 33.3 | 28 | 66.7 | 42 | 2.9 | 0.03 |
|  | No | 278 | 19.9 | 1121 | 80.1 | 1399 | 97.1 | - |
| CHF | Yes | 63 | 30 | 147 | 70 | 210 | 14.6 | <0.001 |
|  | No | 229 | 18.6 | 1002 | 81.4 | 1231 | 85.4 | - |
| Length of stay (days) | <5 | 113 | 22.9 | 381 | 77.1 | 494 | 34.3 | 0.01 |
|  | 5 to <10 | 98 | 17.4 | 465 | 82.6 | 563 | 39.1 | - |
|  | 10 to <20 | 63 | 24.8 | 191 | 75.2 | 254 | 17.6 | - |
|  | 20 and more | 18 | 13.9 | 112 | 86.2 | 130 | 9 | - |
| Insurance type | Medicaid/  Medicare | 253 | 22.5 | 872 | 77.5 | 1125 | 78.1 | <0.001 |
|  | Otherc | 39 | 12.3 | 277 | 87.7 | 319 | 21.9 | - |
| Anemia | Yes | 37 | 29.4 | 89 | 70.6 | 126 | 8.7 | 0.01 |
|  | No | 255 | 19.4 | 1060 | 80.6 | 1315 | 91.3 | - |
| Marital status | Married | 118 | 16.3 | 606 | 83.7 | 724 | 51 | 0.001 |
|  | Single | 64 | 22.5 | 220 | 77.5 | 284 | 20 | - |
|  | Divorced/  Separated/  Widowedd | 103 | 25 | 309 | 75 | 412 | 29 | - |
| Dementia | Yes | 36 | 26.9 | 98 | 73.1 | 134 | 9.3 | 0.046 |
|  | No | 256 | 19.6 | 1051 | 80.4 | 1307 | 90.7 | - |
| CKD failure | Yes | 114 | 25.2 | 338 | 74.8 | 452 | 31.4 | 0.002 |
|  | No | 178 | 18 | 811 | 82 | 989 | 68.6 | - |
| D-dimer > 0.5 | Yes | 127 | 19.6 | 520 | 80.4 | 647 | 73.1 | 0.02 |
|  | No | 30 | 12.6 | 208 | 87.4 | 238 | 26.9 | - |
| Remdesivir | Yes | 103 | 17 | 503 | 83 | 606 | 42.1 | 0.01 |
|  | No | 189 | 22.6 | 646 | 77.4 | 835 | 58 | - |
| COPD | Yes | 83 | 23.7 | 267 | 76.3 | 350 | 24.3 | 0.07 |
|  | No | 209 | 19.2 | 882 | 80.8 | 1091 | 75.7 | - |
| Pulmonary embolism | Yes | 1 | 4.2 | 23 | 95.8 | 24 | 1.7 | 0.07e |
|  | No | 291 | 20.5 | 1126 | 79.5 | 1417 | 98.3 | - |
| Cancer | Yes | 16 | 29.6 | 38 | 70.4 | 54 | 3.8 | 0.08 |
|  | No | 276 | 19.9 | 1111 | 80.1 | 1387 | 96.3 | - |
| Dexamethasone | Yes | 212 | 19.2 | 891 | 80.8 | 1103 | 76.5 | 0.08 |
|  | No | 80 | 23.7 | 258 | 76.3 | 338 | 23.5 | - |
| LDH ≥ 280 U/L | Yes | 51 | 15.8 | 271 | 84.2 | 322 | 42.6 | 0.12 |
|  | No | 88 | 20.2 | 346 | 79.7 | 434 | 57.4 | - |
| Liver cirrhosis | Yes | 6 | 35.3 | 11 | 64.7 | 17 | 1.2 | 0.13e |
|  | No | 286 | 20.1 | 1138 | 79.9 | 1424 | 98.8 | - |
| Diabetes | Yes | 122 | 22.3 | 424 | 77.7 | 546 | 37.9 | 0.13 |
|  | No | 170 | 19 | 725 | 81 | 895 | 62.1 | - |
| ARF | Yes | 97 | 18.3 | 433 | 81.7 | 530 | 36.8 | 0.16 |
|  | No | 195 | 21.4 | 716 | 78.6 | 911 | 63.2 | - |
| CRP ≥ 3.0 mg/L | Yes | 117 | 20 | 467 | 80 | 584 | 69.3 | 0.19 |
|  | No | 42 | 16.2 | 217 | 83.8 | 259 | 30.7 | - |
| Gender | Male | 153 | 21.5 | 559 | 78.5 | 712 | 49.4 | 0.25 |
|  | Female | 139 | 19.1 | 590 | 80.9 | 729 | 50.6 | - |
| Tobacco dependence | Yes | 25 | 21.2 | 93 | 78.8 | 118 | 8.2 | 0.8 |
|  | No | 267 | 20.2 | 1056 | 79.8 | 1323 | 91.8 | - |
| Thrombocytopenia | Yes | 25 | 17.7 | 116 | 82.3 | 141 | 9.8 | 0.43 |
|  | No | 267 | 20.5 | 1033 | 79.5 | 1300 | 90.2 | - |
| Lipidemias | Yes | 101 | 21.3 | 373 | 78.7 | 474 | 32.9 | 0.49 |
|  | No | 191 | 19.8 | 776 | 80.3 | 967 | 67.1 | - |
| Leucopenia | Yes | 22 | 22.7 | 75 | 77.3 | 97 | 6.7 | 0.54 |
|  | No | 270 | 20.1 | 1074 | 79.9 | 1344 | 93.3 | - |
| Alcohol dependence | Yes | 5 | 26.3 | 14 | 73.7 | 19 | 1.3 | 0.56e |
|  | No | 287 | 20.2 | 1135 | 79.8 | 1422 | 98.7 | - |
| Hepatitis | Yes | 2 | 22.2 | 7 | 77.8 | 9 | 4.8 | 0.65e |
|  | No | 30 | 16.7 | 150 | 83.3 | 180 | 95.2 | - |
| ICU | Yes | 31 | 20.4 | 133 | 81.1 | 164 | 11.4 | 0.65 |
|  | No | 261 | 18.9 | 1016 | 79.6 | 1277 | 88.6 | - |
| TIA | Yes | 28 | 21.7 | 101 | 78.3 | 129 | 9 | 0.67 |
|  | No | 264 | 20.1 | 1048 | 79.8 | 1312 | 91.1 | - |
| High erythrocyte sedimentation rate | Yes | 33 | 16.3 | 169 | 83.7 | 202 | 73.5 | 0.77 |
|  | No | 13 | 17.8 | 60 | 82.2 | 73 | 26.6 | - |
| High ferritin | Yes | 86 | 19.4 | 358 | 80.6 | 444 | 52.1 | 0.84 |
|  | No | 77 | 18.8 | 332 | 81.2 | 409 | 48 |  |
| Hypertension | Yes | 180 | 20.3 | 709 | 79.8 | 889 | 61.7 | 0.98 |
|  | No | 112 | 20.3 | 440 | 79.7 | 552 | 38.3 | - |
| Opiate dependence | Yes | 199 | 20.3 | 783 | 79.7 | 982 | 68.2 | 1.0 |
|  | No | 93 | 20.3 | 366 | 79.7 | 459 | 31.9 | - |

BMI: body mass index; CKD: chronic kidney disease; ARF: acute respiratory failure; COPD: chronic obstructive pulmonary disease; TIA: transient ischemic attack; CRP: C-reactive protein; LDH: lactate dehydrogenase.

Sorted by statistical significance and effect size, with statistically significant results with the highest effect size at the top of the table.

aComparisons tested using Chi-square tests unless otherwise noted. Bolded p-values are <0.05.

bComparison tested with ANOVA due to >2 groups.

cCombined for statistical purposes: agency, employee health insurance, commercial, self-pay, workers compensation.

dCombined for statistical purposes: divorced, separated, widow, widower.

eComparison tested using Fishers exact test to adjust for small cell sizes.

Supplementary Table 3: Differences in demographic characteristics, intake diagnoses, serum biomarkers, and treatments among patients that were readmitted between 31 and 60 days after hospitalization versus those that were not readmitted in a sample of patients that survived first hospitalization for COVID-19 (n=1441)

|  |  | Readmitted (n=70) | | Not readmitted (n=1371) | | Total (n=1441) | |  |
| --- | --- | --- | --- | --- | --- | --- | --- | --- |
|  |  | n | % (within row) | n | % (within row) | n | % (of total) | p-valuea |
| BMI | <18.5 | 5 | 12.8 | 34 | 87.2 | 39 | 2.8 | 0.002b,c |
|  | 18.5- <25.0 | 18 | 7.6 | 218 | 92.4 | 236 | 17 | - |
|  | 25.0 - <30.0 | 22 | 5.9 | 349 | 94.1 | 371 | 26.8 | - |
|  | 30.0 - <35.0 | 6 | 2.1 | 284 | 97.9 | 290 | 20.9 | - |
|  | 35 and greater | 16 | 3.6 | 433 | 96.4 | 449 | 32.4 | - |
| Length of stay (days) | <5 | 19 | 3.9 | 475 | 96.2 | 494 | 34.3 | 0.002 |
|  | 5 to <10 | 20 | 3.6 | 543 | 96.5 | 563 | 39.1 | - |
|  | 10 to <20 | 17 | 6.7 | 237 | 93.3 | 254 | 17.6 | - |
|  | 20 and more | 14 | 10.8 | 116 | 89.2 | 130 | 9 | - |
| Tobacco dependence | Yes | 12 | 10.2 | 106 | 89.8 | 118 | 8.2 | 0.01 |
|  | No | 58 | 4.4 | 1265 | 95.6 | 1323 | 91.8 | - |
| Dexamethasone | Yes | 40 | 3.6 | 1063 | 96.4 | 1103 | 76.5 | <0.001 |
|  | No | 30 | 8.9 | 308 | 91.1 | 338 | 23.5 | - |
| CHF | Yes | 18 | 8.6 | 192 | 91.4 | 210 | 14.6 | 0.01 |
|  | No | 52 | 4.2 | 1179 | 95.8 | 1231 | 85.4 | - |
| Remdesivir | Yes | 17 | 2.8 | 589 | 97.2 | 606 | 42.1 | 0.002 |
|  | No | 53 | 6.4 | 782 | 93.7 | 835 | 58 | - |
| D-dimer > 0.5 | Yes | 26 | 4 | 621 | 96 | 647 | 73.1 | 0.04 |
|  | No | 3 | 1.3 | 235 | 98.7 | 238 | 26.9 | - |
| Insurance type | Medicaid/  Medicare | 61 | 5.4 | 1064 | 94.6 | 1125 | 78.1 | 0.06 |
|  | Otherd | 9 | 2.9 | 307 | 97.2 | 316 | 21.9 | - |
| Age (years) | 18 to 39 | 3 | 2.4 | 122 | 97.6 | 125 | 8.7 | 0.09 |
|  | 40 to 49 | 7 | 4.4 | 154 | 95.7 | 161 | 11.2 | - |
|  | 50 to 64 | 12 | 3.2 | 361 | 96.8 | 373 | 25.9 | - |
|  | 65 to 74 | 27 | 7.1 | 355 | 92.9 | 382 | 26.5 | - |
|  | 74 and older | 21 | 5.3 | 379 | 94.8 | 400 | 27.8 | - |
| Marital status | Married | 28 | 3.9 | 696 | 96.1 | 724 | 51 | 0.09 |
|  | Single | 14 | 4.9 | 270 | 95.1 | 284 | 20 | - |
|  | Divorced/  Separated/  Widowede | 28 | 6.8 | 384 | 93.2 | 412 | 29 | - |
| COPD | Yes | 23 | 6.6 | 327 | 93.4 | 350 | 24.3 | 0.09 |
|  | No | 47 | 4.3 | 1044 | 95.7 | 1091 | 75.7 | - |
| Thrombocytopenia | Yes | 11 | 7.8 | 130 | 92.2 | 141 | 9.8 | 0.09 |
|  | No | 59 | 4.5 | 1241 | 95.5 | 1300 | 92.2 | - |
| Hepatitis | Yes | 2 | 22.2 | 7 | 77.8 | 9 | 4.8 | 0.09c |
|  | No | 9 | 5 | 171 | 95 | 180 | 95.2 | - |
| TIA | Yes | 10 | 7.8 | 119 | 92.3 | 129 | 9 | 0.11 |
|  | No | 60 | 4.6 | 1252 | 95.4 | 1312 | 91 | - |
| Lipidemias | Yes | 29 | 6.1 | 445 | 93.9 | 474 | 32.9 | 0.12 |
|  | No | 41 | 4.2 | 926 | 95.8 | 967 | 67.1 | - |
| CRP ≥ 3.0 mg/L | Yes | 22 | 3.8 | 562 | 96.2 | 584 | 69.3 | 0.12 |
|  | No | 16 | 6.2 | 243 | 93.8 | 259 | 30.7 | - |
| LDH ≥ 280 U/L | Yes | 8 | 2.5 | 314 | 97.5 | 322 | 42.6 | 0.13 |
|  | No | 20 | 4.6 | 414 | 95.4 | 434 | 57.4 | - |
| Pancytopenia | Yes | 4 | 9.5 | 38 | 90.5 | 42 | 2.9 | 0.14c |
|  | No | 66 | 4.7 | 1333 | 95.3 | 1399 | 97.1 | - |
| Stroke | Yes | 3 | 9.7 | 28 | 90.3 | 31 | 2.2 | 0.19c |
|  | No | 67 | 4.8 | 1343 | 95.3 | 1410 | 97.9 | - |
| Hypertension | Yes | 48 | 5.4 | 841 | 94.6 | 889 | 61.7 | 0.23 |
|  | No | 22 | 4 | 530 | 96 | 552 | 38.3 | - |
| Alcohol dependence | Yes | 2 | 10.5 | 17 | 89.5 | 19 | 1.3 | 0.24c |
|  | No | 68 | 4.8 | 1354 | 95.2 | 1422 | 98.7 | - |
| Opiate dependence | Yes | 52 | 5.3 | 930 | 94.7 | 982 | 68.2 | 0.26 |
|  | No | 18 | 3.9 | 441 | 96.1 | 459 | 31.9 | - |
| High ferritin | Yes | 15 | 3.4 | 429 | 96.6 | 444 | 52.1 | 0.27 |
|  | No | 20 | 4.9 | 389 | 95.1 | 409 | 48 | - |
| Dementia | Yes | 9 | 6.7 | 125 | 93.3 | 134 | 9.3 | 0.29 |
|  | No | 61 | 4.7 | 1246 | 95.3 | 1307 | 90.7 | - |
| Cancer | Yes | 4 | 7.4 | 50 | 92.6 | 54 | 3.8 | 0.33c |
|  | No | 66 | 4.8 | 1321 | 95.2 | 1387 | 96.3 | - |
| ARF | Yes | 22 | 4.2 | 508 | 95.9 | 530 | 36.8 | 0.34 |
|  | No | 48 | 5.3 | 863 | 94.7 | 911 | 63.2 | - |
| Anemia | Yes | 8 | 6.4 | 118 | 93.7 | 126 | 8.7 | 0.42 |
|  | No | 62 | 4.7 | 1253 | 95.3 | 1315 | 91.3 | - |
| Leucopenia | Yes | 6 | 6.2 | 91 | 93.8 | 97 | 6.7 | 0.47c |
|  | No | 64 | 4.8 | 1280 | 95.2 | 1344 | 93.3 | - |
| High erythrocyte sedimentation rate | Yes | 10 | 5 | 192 | 95.1 | 202 | 73.5 | 0.54 |
|  | No | 5 | 6.9 | 68 | 93.2 | 73 | 26.6 | - |
| Gender | Male | 37 | 5.2 | 675 | 94.8 | 712 | 49.4 | 0.55 |
|  | Female | 33 | 4.5 | 696 | 95.5 | 729 | 50.6 | - |
| Liver cirrhosis | Yes | 1 | 5.9 | 16 | 94.1 | 17 | 1.2 | 0.57c |
|  | No | 69 | 4.9 | 1355 | 95.2 | 1424 | 98.8 | - |
| Pulmonary embolism | Yes | 0 | 0 | 24 | 100 | 24 | 1.7 | 0.63c |
|  | No | 70 | 4.9 | 1347 | 95.1 | 1417 | 98.3 | - |
| ICU | Yes | Yes | 7 | 4.3 | 157 | 95.7 | 164 | 11.4 |
|  | No | No | 63 | 4.9 | 1214 | 95.1 | 1277 | 88.6 |
| Diabetes | Yes | 26 | 4.8 | 520 | 95.2 | 546 | 37.9 | 0.9 |
|  | No | 44 | 4.9 | 851 | 95.1 | 895 | 62.1 | - |
| CKD failure | Yes | 22 | 4.9 | 430 | 95.1 | 452 | 31.4 | 0.99 |
|  | No | 48 | 4.9 | 941 | 95.2 | 989 | 68.6 | - |

BMI: body mass index; CKD: chronic kidney disease; ARF: acute respiratory failure; COPD: chronic obstructive pulmonary disease; TIA: transient ischemic attack; CRP: C-reactive protein; LDH: lactate dehydrogenase.

Sorted by statistical significance and effect size, with statistically significant results with the highest effect size at the top of the table.

aComparisons tested using Chi-square tests unless otherwise noted. Bolded p-values are <0.05.

bComparison tested with ANOVA due to >2 groups.

cComparison tested using Fishers exact test to adjust for small cell sizes.

dCombined for statistical purposes: agency, employee health insurance, commercial, self-pay, workers compensation.

eCombined for statistical purposes: divorced, separated, widow, widower.

Supplementary Table 4: Factors associated with length of stay (days) in a multivariable linear regression model in a sample of patients hospitalized for COVID-19 (n=1600)a

| Variables | Coefficientb | L95% CI | U95% CI | P-value |
| --- | --- | --- | --- | --- |
| Age (years) |  |  |  | <0.001 |
| 18 to 49 | (ref) | - | - | 0.18 |
| 50 to 64 | 1.08 | 0.94 | 1.23 | <0.001 |
| 65 and olderc | 1.28 | 1.11 | 1.47 | - |
| Marital Status |  |  |  | <0.001 |
| Married | (ref) | - | - | - |
| Single | 1.32 | 1.23 | 1.43 | <0.001 |
| Otherd | 1.01 | 0.95 | 1.07 | 0.88 |
| Anemia | 1.34 | 1.22 | 1.46 | <0.001 |
| Leucopenia | 1.18 | 1.08 | 1.29 | 0.02 |
| Hypertension | 1.24 | 1.15 | 1.33 | <0.001 |
| CKD failure | 1.14 | 1.02 | 1.27 | 0.003 |
| ARF | 1.28 | 1.15 | 1.43 | <0.001 |
| Dementia | 1.38 | 1.23 | 1.55 | <0.001 |
| Diabetes | 1.13 | 1.07 | 1.20 | 0.001 |
| Thrombocytopenia | 1.20 | 1.03 | 1.40 | 0.002 |
| Remdesivir | 1.44 | 1.33 | 1.56 | <0.001 |
| Intercept | 2.92 | 2.52 | 3.38 | <0.001 |

ARF: acute respiratory failure; CKD: chronic kidney disease; ICU: intensive care unit

Random intercept variance estimate and 95% CI for facility: 0.01 (0.002, 0.02).

Random intercept variance estimate and 95% CI for month: 0.02 (0.01, 0.03).

aMissing data: Lower sample size due to missing data as described in Results.

bLength of stay was log10 transformed to meet linearity assumptions. Back-transformed coefficients and confidence intervals are presented. Model calculated with robust standard errors.

cFurther combined for statistical analysis purposes.

dCombined for statistical purposes: divorced, separated, widow, widower.

Supplementary Table 5: Factors associated with odds of being readmitted within 30 days in a multivariable logistic regression model in a sample of patients that survived first hospitalization for COVID-19 (n=1390)a

| Variable | OR | L95% CI | U95% CI | P-value |
| --- | --- | --- | --- | --- |
| Age (years)b |  |  |  | 0.003 |
| 18 to 49 | (ref) | - | - | - |
| 50 to 64 | 1.68 | 1.05 | 2.66 | 0.03 |
| 65 and older | 2.12 | 1.37 | 3.29 | 0.001 |
| Marital status |  | - | - | 0.01 |
| Married | (ref) | - | - | - |
| Single | 1.65 | 1.15 | 2.36 | 0.01 |
| Other | 1.37 | 1.00 | 1.88 | 0.047 |
| Length of stay (days) |  |  |  | <0.001 |
| <5 | (ref) | - | - | - |
| 5 to <10 | 0.6 | 0.44 | 0.83 | 0.002 |
| 10 to <20 | 0.73 | 0.5 | 1.07 | 0.1 |
| 20 and greater | 0.33 | 0.19 | 0.58 | <0.001 |
| Insurance other than Medicaid and Medicarec | 0.62 | 0.41 | 0.93 | 0.02 |
| Congestive heart failure | 1.64 | 0.15 | 2.33 | 0.01 |
| Anemia | 1.64 | 1.06 | 2.52 | 0.03 |
| Pancytopenia | 2.08 | 1.05 | 4.12 | 0.04 |
| Intercept | 0.15 | 0.1 | 0.24 | <0.001 |

aLower sample size due to missing data as described in Results.

bFurther combined for statistical analysis purposes.

cCombined for statistical purposes: agency, employee health insurance, commercial, self-pay, workers compensation.

Supplementary Table 6: Factors associated with odds of being readmitted between 31 and 61 days in two multivariable logistic regression models in a sample of patients that survived first hospitalization for COVID-19

| Sub-sample with biomarkers (n= 886)a,b | | | | |
| --- | --- | --- | --- | --- |
| Variable | OR | L95% CI | U95% CI | P-value |
| D-dimer >0.5 | 3.67 | 1.08 | 12.45 | 0.04 |
| Intercept | 0.01 | 0.002 | 0.03 | <0.001 |
| Full sample without biomarkers (n=1385)a,c | | | | |
| Variable | OR | L95% CI | U95% CI | P-value |
| BMI |  |  |  | 0.01 |
| <18.5 | (ref) | - | - | - |
| 18.5- <25.0 | 0.57 | 0.19 | 1.76 | 0.33 |
| 25.0 - <30.0 | 0.53 | 0.18 | 1.59 | 0.26 |
| 30.0 - <35.0 | 0.16 | 0.04 | 0.58 | 0.01 |
| 35 and greater | 0.28 | 0.09 | 0.86 | 0.03 |
| Congestive heart failure | 2.56 | 1.42 | 4.63 | <0.001 |
| Dexamethasone | 0.37 | 0.21 | 0.63 | 0.002 |
| Intercept | 0.17 | 0.05 | 0.51 | 0.002 |

BMI: body mass index

aLower sample size due to missing data as described in Results.

bRandom intercept variance estimate and 95% CI for facility: 0.25 (0.01, 4.71). Random intercept variable estimate and 95% CI for month: 0.18 (0.003, 10.51).

cRandom intercept variance estimate and 95% CI for month: 0.18 (0.01, 2.12). Random intercept variable estimate and 95% CI for month: 0.19 (0.02, 2.24).
